# Supplementary material
Source: Springer Nature journal article supplement (https://www.springermedizin.de/resource/supplementary/12879_2012_1988_MOESM2_ESM.pdf/9443510)

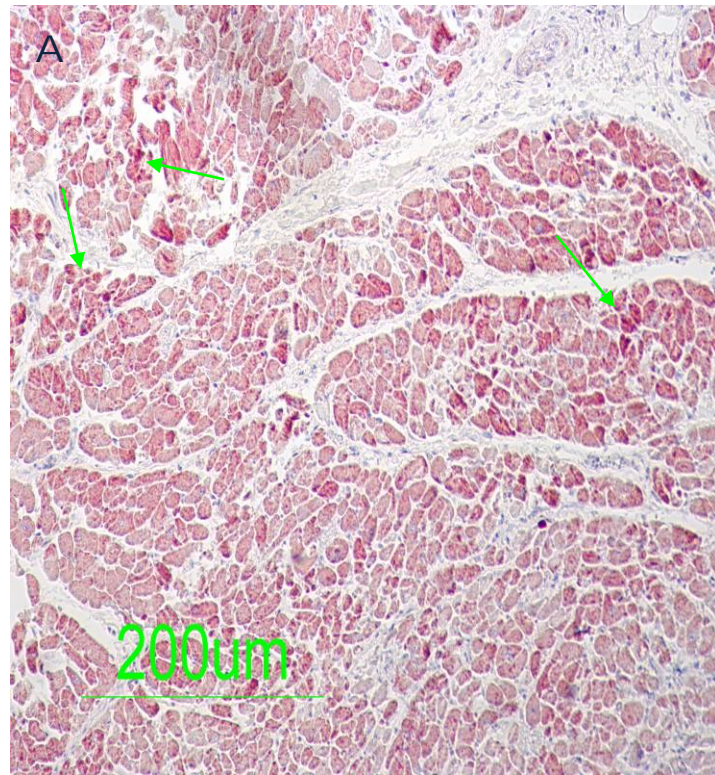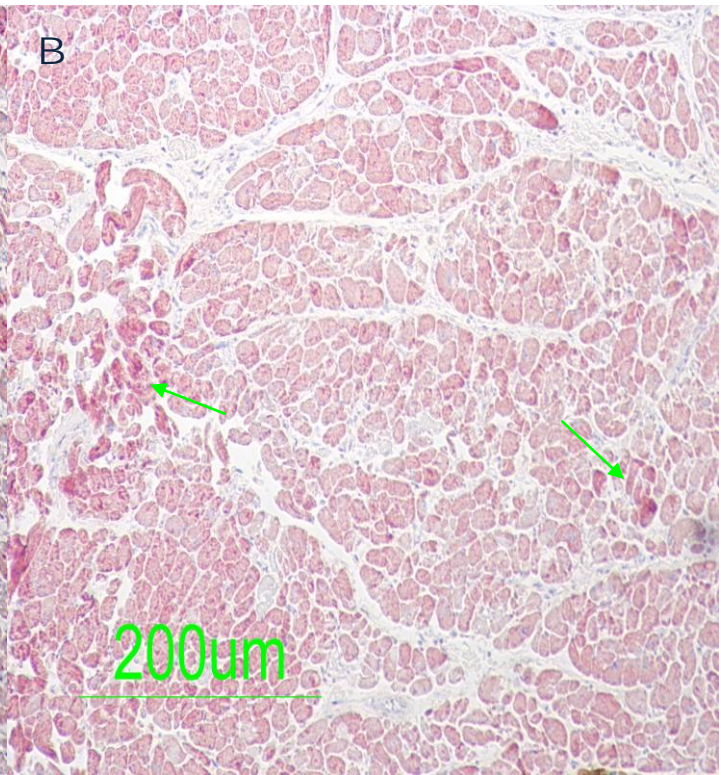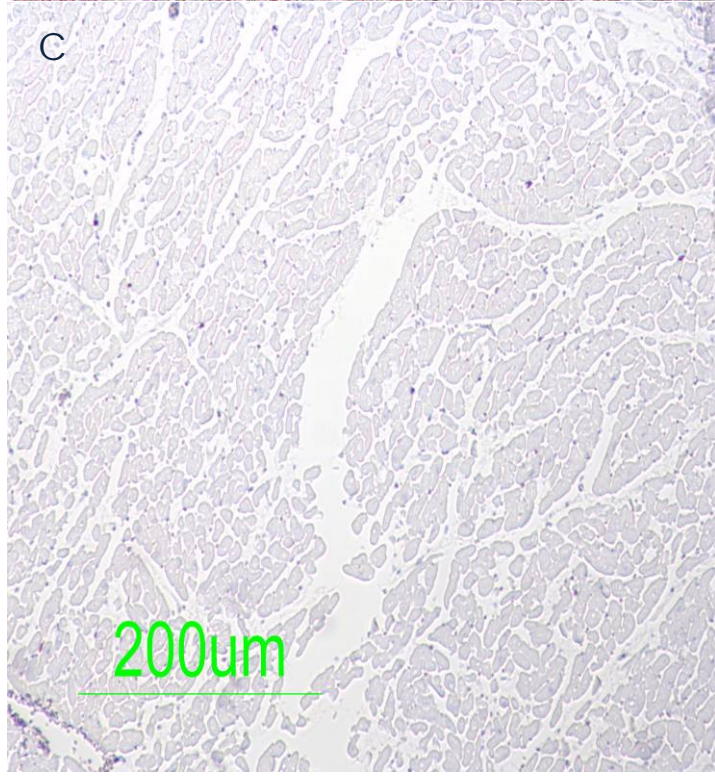

Supplement: MOESM2 [file 9443510]
